# Supplementary material
Source: PubMed Central journal article supplement (PMC4201071)

|                  |                   | <b>IC<sub>50</sub> (μM)</b> |            |            |             |
|------------------|-------------------|-----------------------------|------------|------------|-------------|
|                  |                   | Meriolin 3                  | Meriolin 5 | Meriolin 7 | Meriolin 15 |
| <b>Compounds</b> | <b>Cell lines</b> |                             |            |            |             |
|                  | SW1088            | 0.034                       | 0.032      | >10        | 0.0018      |
|                  | U87               | 0.076                       | 0.0184     | >10        | 0.00042     |
|                  | HUV-EC-C          | 0.815                       | 0.0051     | >10        | 0.00279     |
|                  | bEnd3             | 0.196                       | 0.095      | >10        | 0.018       |

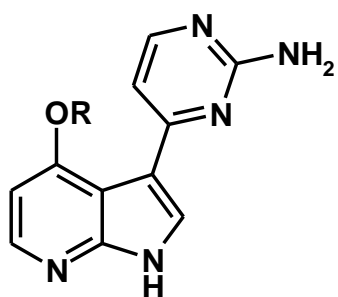

Meriolin 3 : R = CH<sub>3</sub>

Meriolin 5 : R = CH<sub>2</sub>CH<sub>2</sub>CH<sub>3</sub>

Meriolin 7 : R = CH<sub>2</sub>CH<sub>2</sub>OCH<sub>3</sub>

Meriolin 15 : R = CH<sub>2</sub>C<sub>6</sub>H<sub>5</sub>

bEnd3

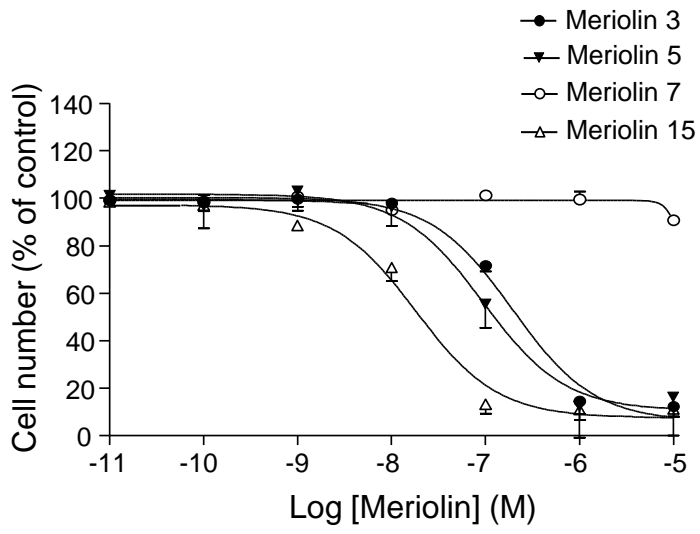

# SW1088

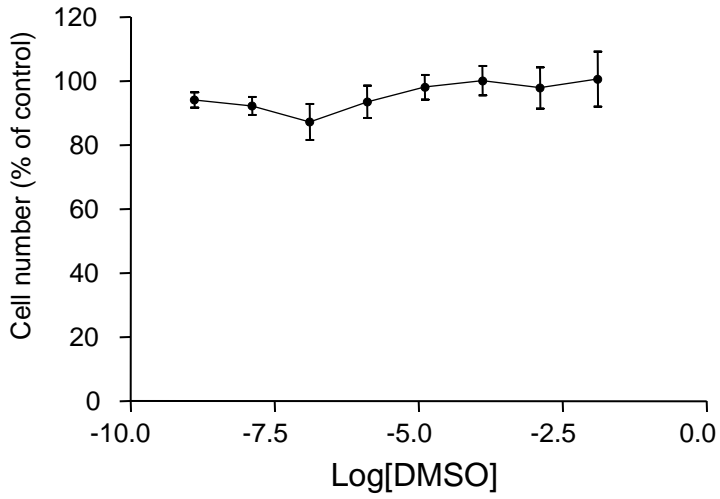

# Astrocytes

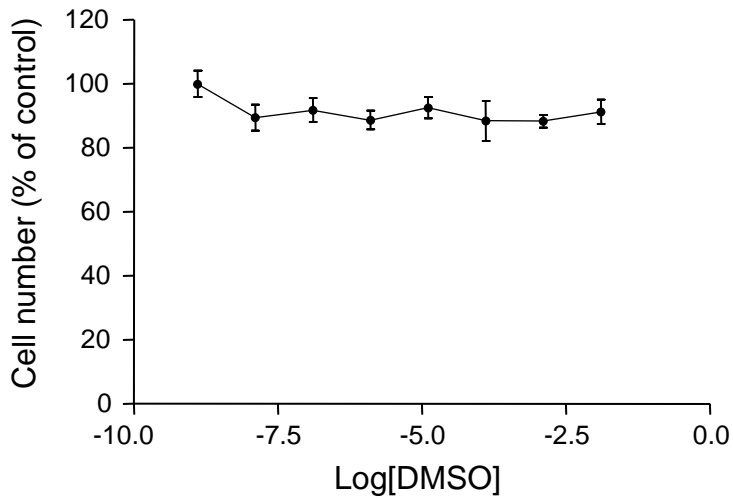

# Neurons

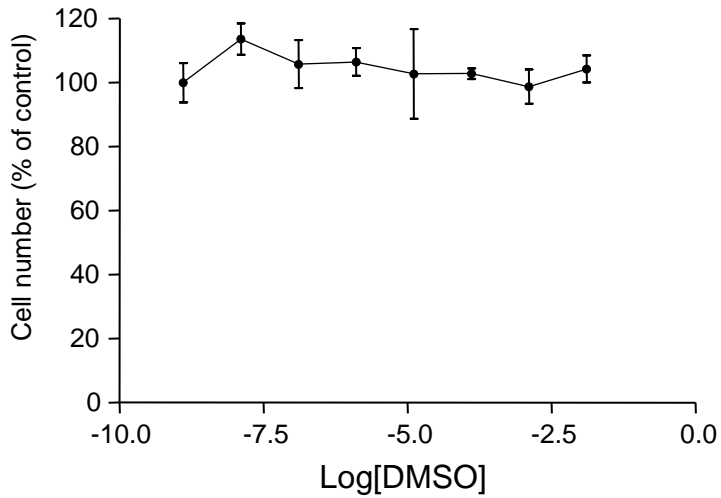

**A**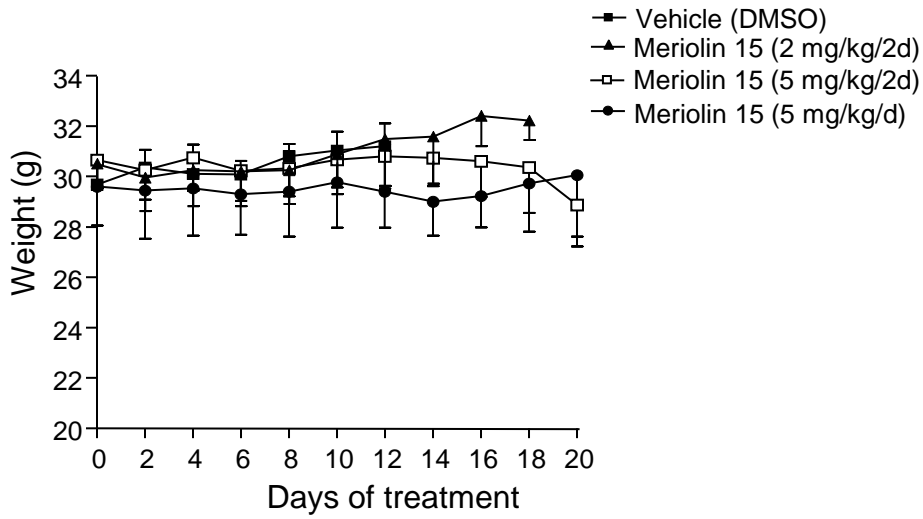**B**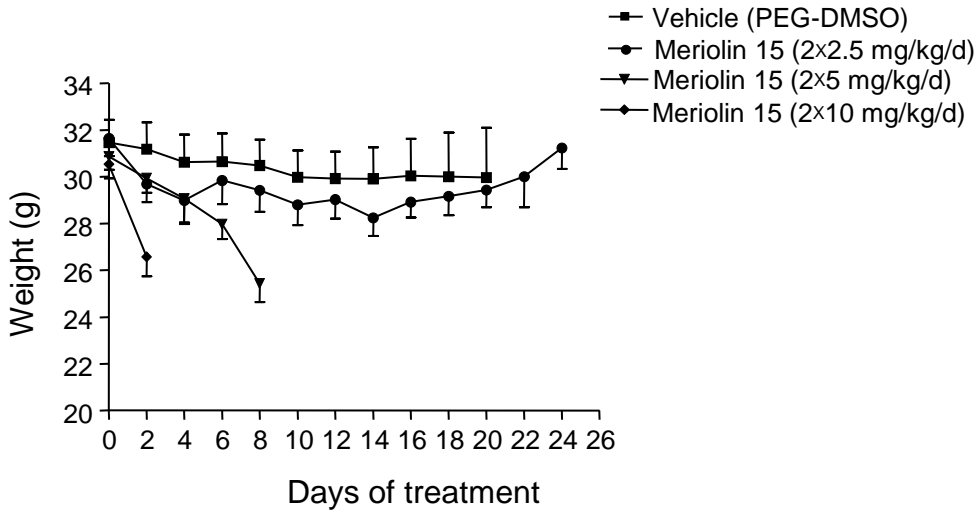

Supplement: supp_nou102_nou102supp_figs.pdf [file supp_nou102_nou102supp_figs.pdf]
